# Supplementary material for: Abrupt climate change and millennial-scale cycles: an astronomical mechanism
Source: Copernicus journal article supplement (doi:10.5194/cp-2022-49), 2022-06-16
Supplement: Supplementary file 1 [file cp-2022-49-supplement.pdf]

## FIGURES

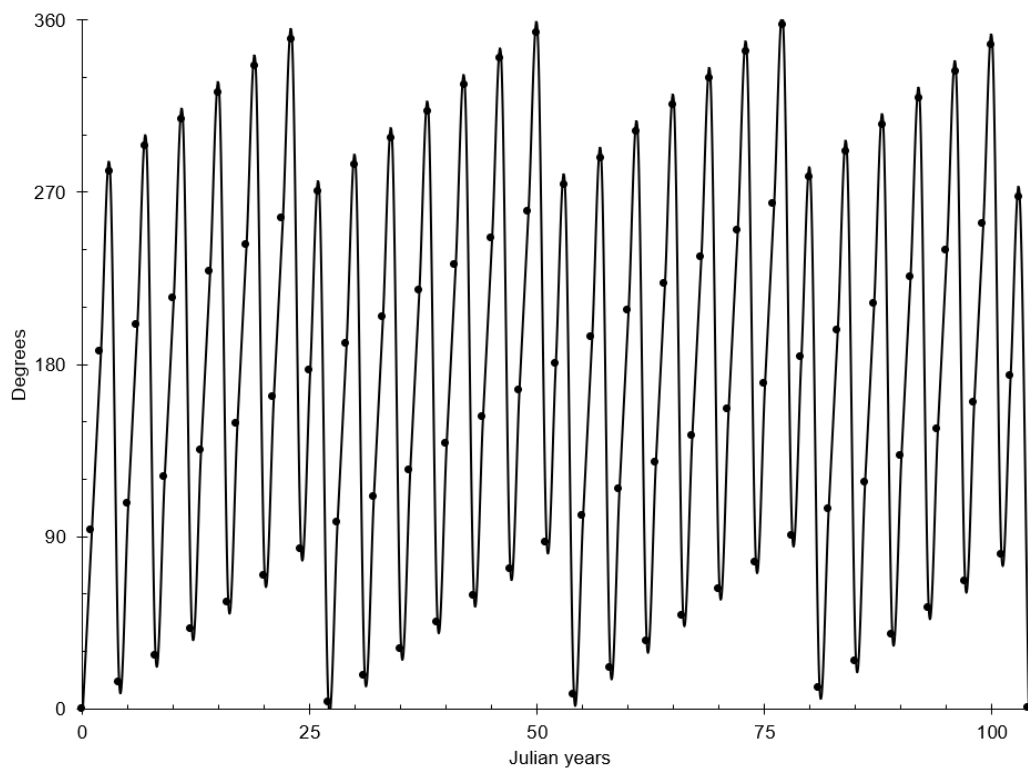

Figure S1: Earth's spin-orbit coupling relative to the perihelion (anomalistic year cycle). The first closest return ( $<1^\circ$ ) to the starting point occurs at 104 yrs. Two other close returns can be seen at 27 yrs ( $3.66^\circ$ ) and 77 yrs ( $-2.89^\circ$ ); The third return at 54 yrs is  $-7.32^\circ$ .

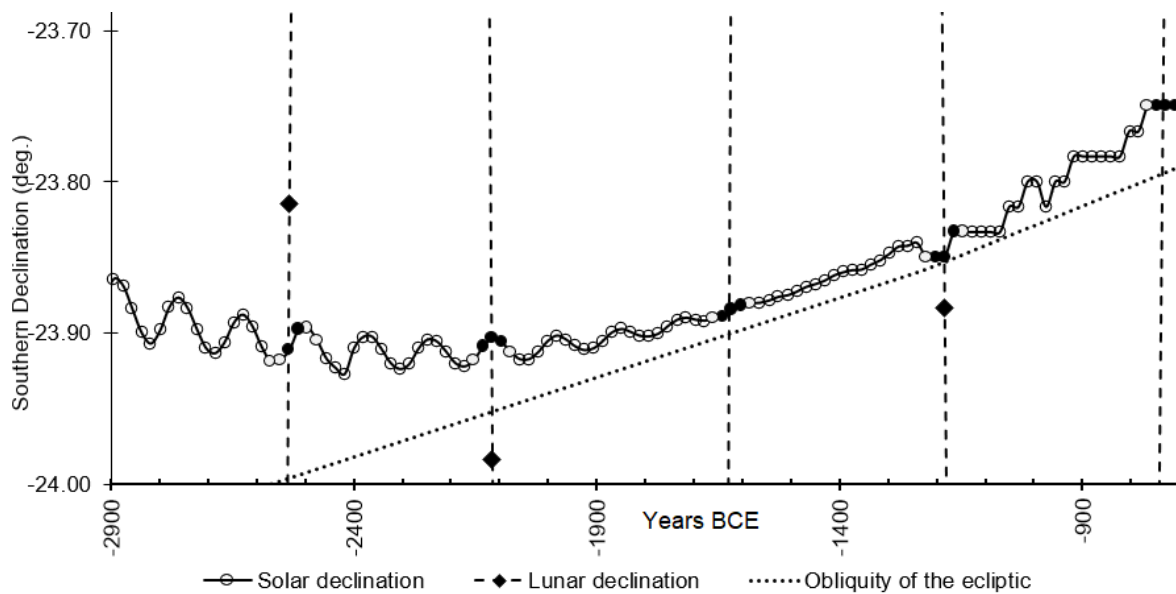

Figure S2: Zoom of solar declinations associated with the Metonic lunation series based on the current perihelion, showing the flattened declinations between  $\sim 1900$  BCE and  $\sim 700$  BCE. Black-filled markers are total or annular eclipses; grey-filled markers are partial solar eclipses. The dotted line shows the obliquity of the ecliptic. A Metonic eclipse occurs right on the ecliptic at the December solstice in 1183 BCE.

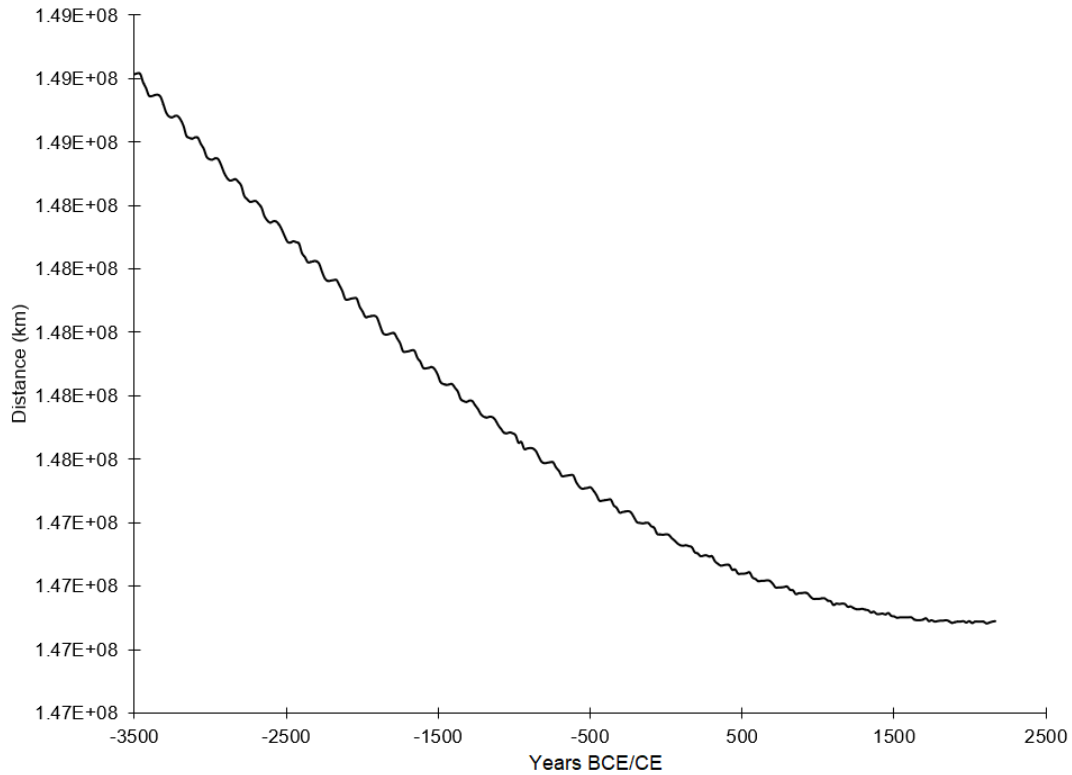

Figure S3: Earth-Sun distance at Metonic lunation (based on Metonic lunation series associated with the current perihelion). Negative values on the x-axis are BCE. The wiggles are 133-yr intervals and rarely at 114-yrs.

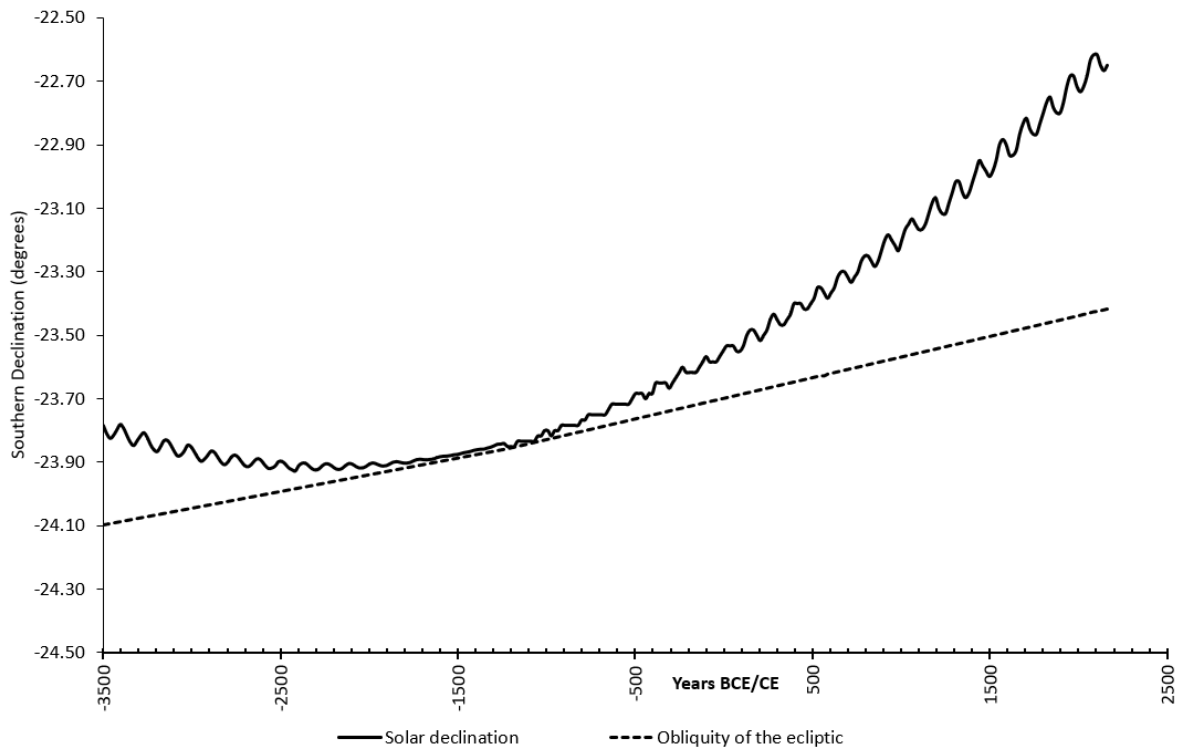

Figure S4: Solar declination changes relative to the obliquity of the ecliptic over the past 5.5 ky. The 1000-yr period during the 2<sup>nd</sup> millennium BCE was a time of suppressed solar declination variation. Negative values on x-axis are BCE. Peaks occur at 133-yr intervals.

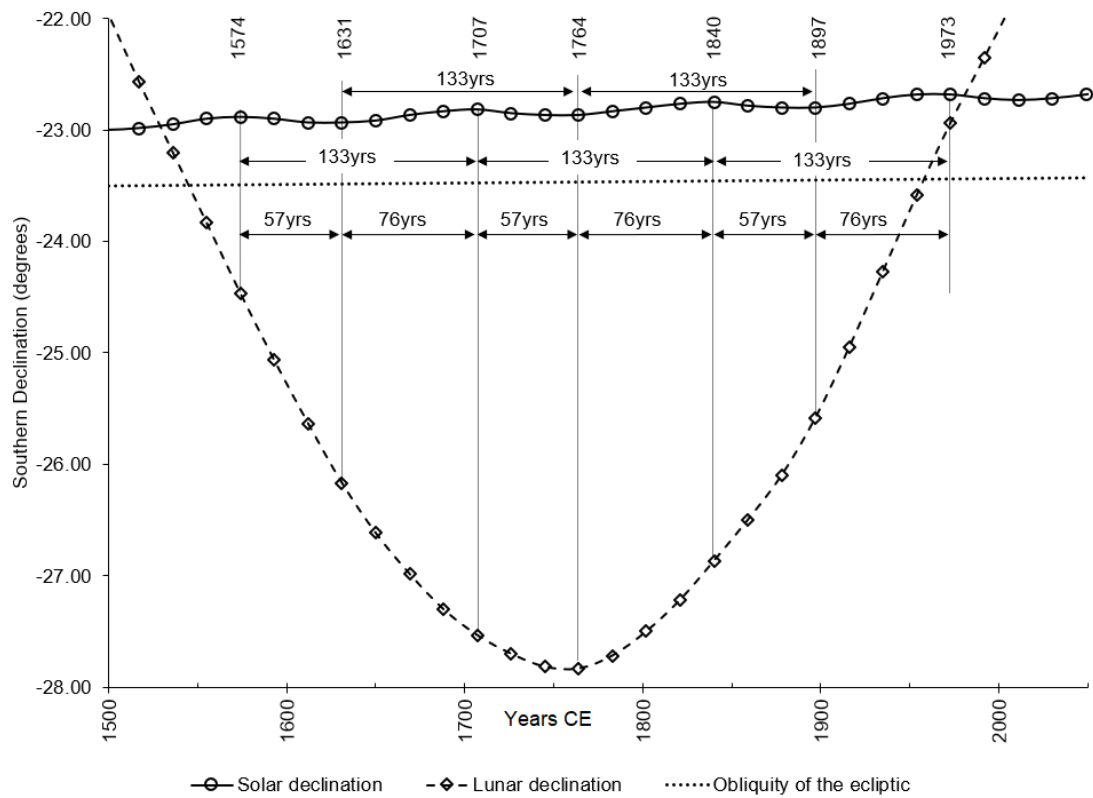

Figure S5: Solar declination cycle since 1500 CE shows a periodicity spanning 133 yrs, comprised of 57-yr and 76-yr sub-periods.

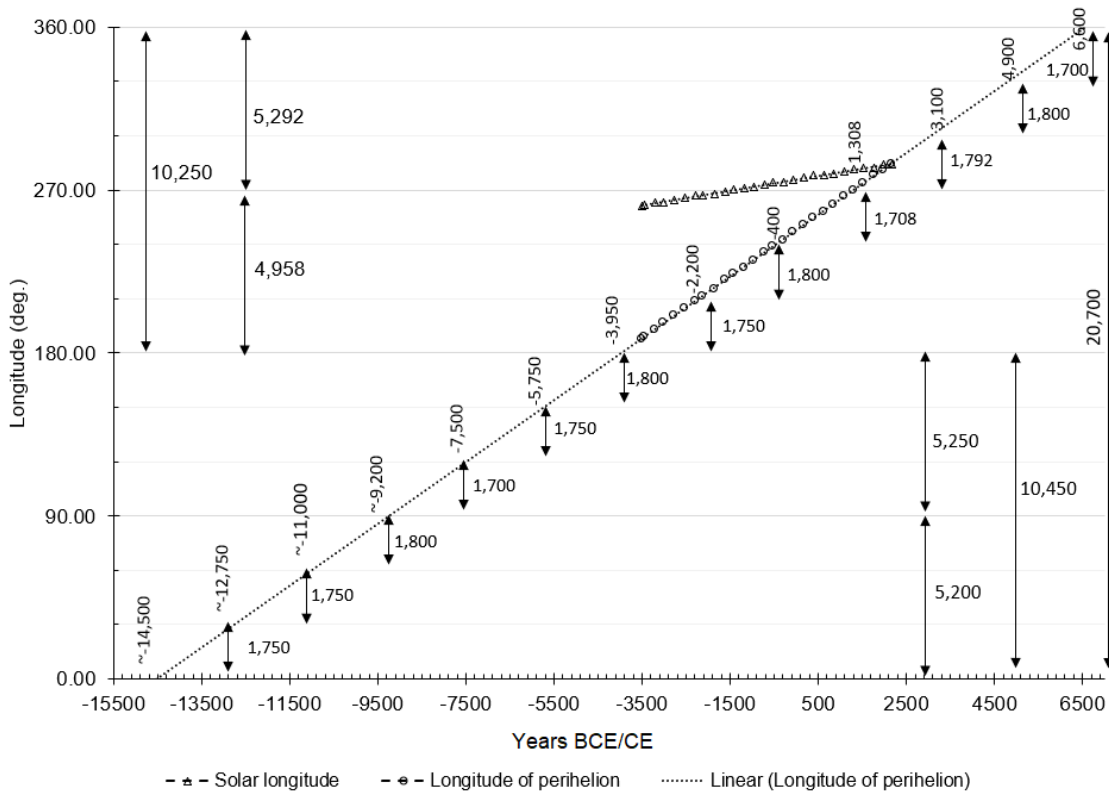

Figure S6: Movement of the perihelion through the tropical year. A cycle of ~21 ky can be seen, with quarterly cycles in the vicinity of the length of Heinrich IRD events. Solar and lunar gravitational forcing respectively contribute one-third and two-thirds to precession (Lowrie, 2004).

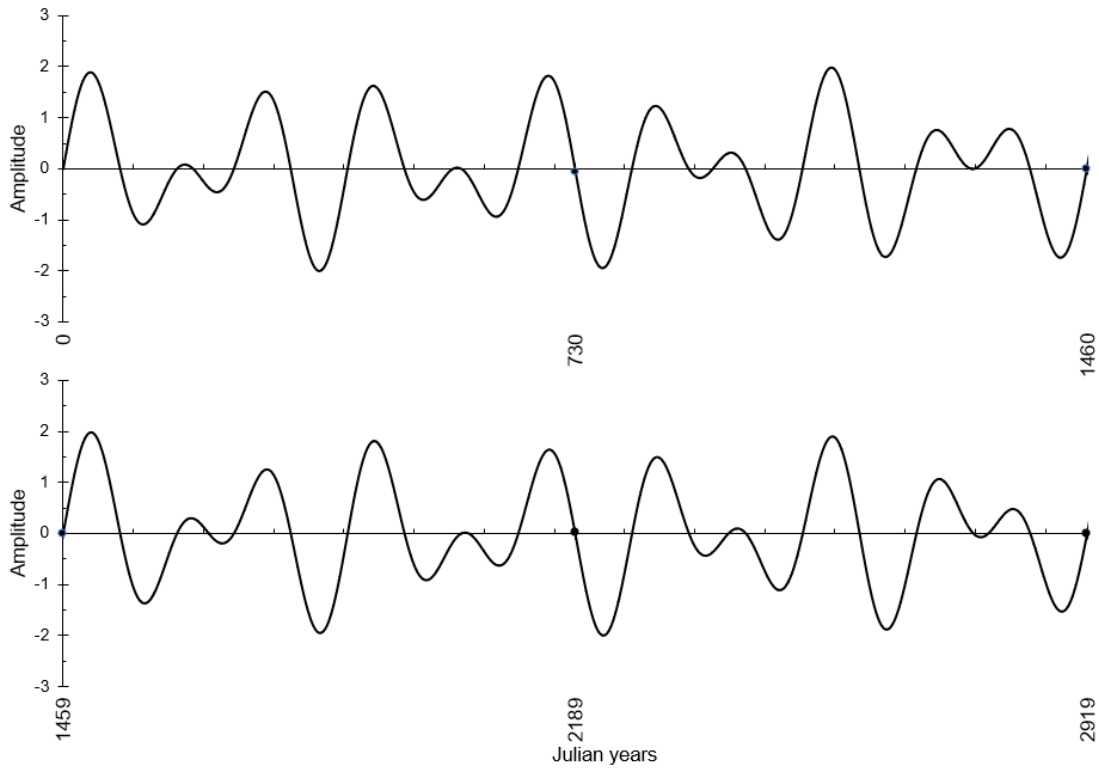

Figure S7: The modelled superposition of the 133-yr and 207.54-yr cycles. The interaction produces a cyclical pattern that repeats after 1459 Julian years. This can be seen in the strongly similar patterns between the first 1459 yrs (top panel) and second 1459 yrs (bottom panel).

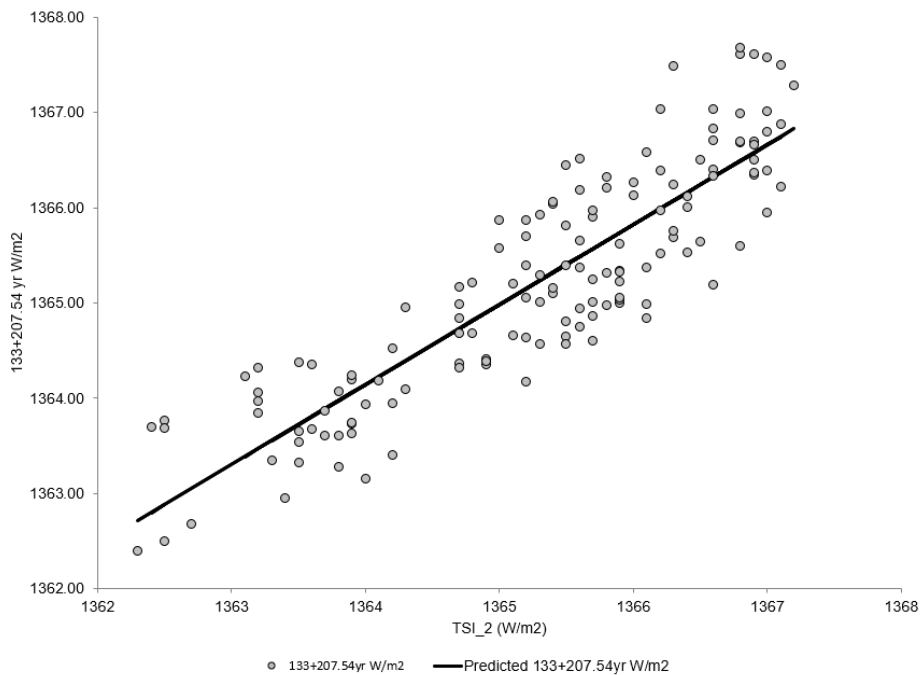

Figure S8: Regression Line-Point Fit between the model (expected behaviour) and TSI\_2, which is the total solar irradiance reconstruction by Bard et al. (Bard et al., 2007) with geomagnetic corrections based on  $^{10}\text{Be}$  isotopes from the South Pole. A strong positive correlation is shown. This regression line fit is very similar to those of TSI\_1 and TSI\_3.

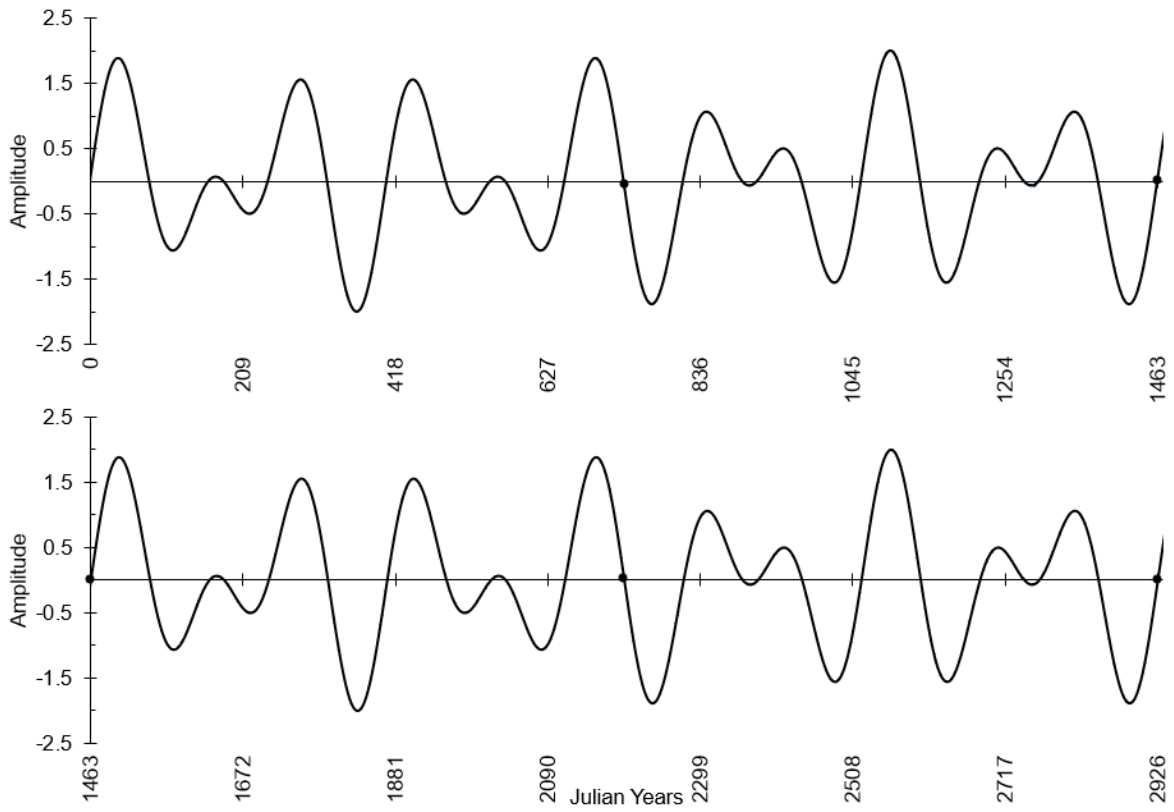

Figure S9: Modelled activity of the interaction between the 209-yr and 133-yr cycles at 19-yr resolution. The cycle repeats itself every 1463 Julian years. This can be seen in the strongly similar patterns between the first 1463 yrs (top panel) and second 1463 yrs (bottom panel).

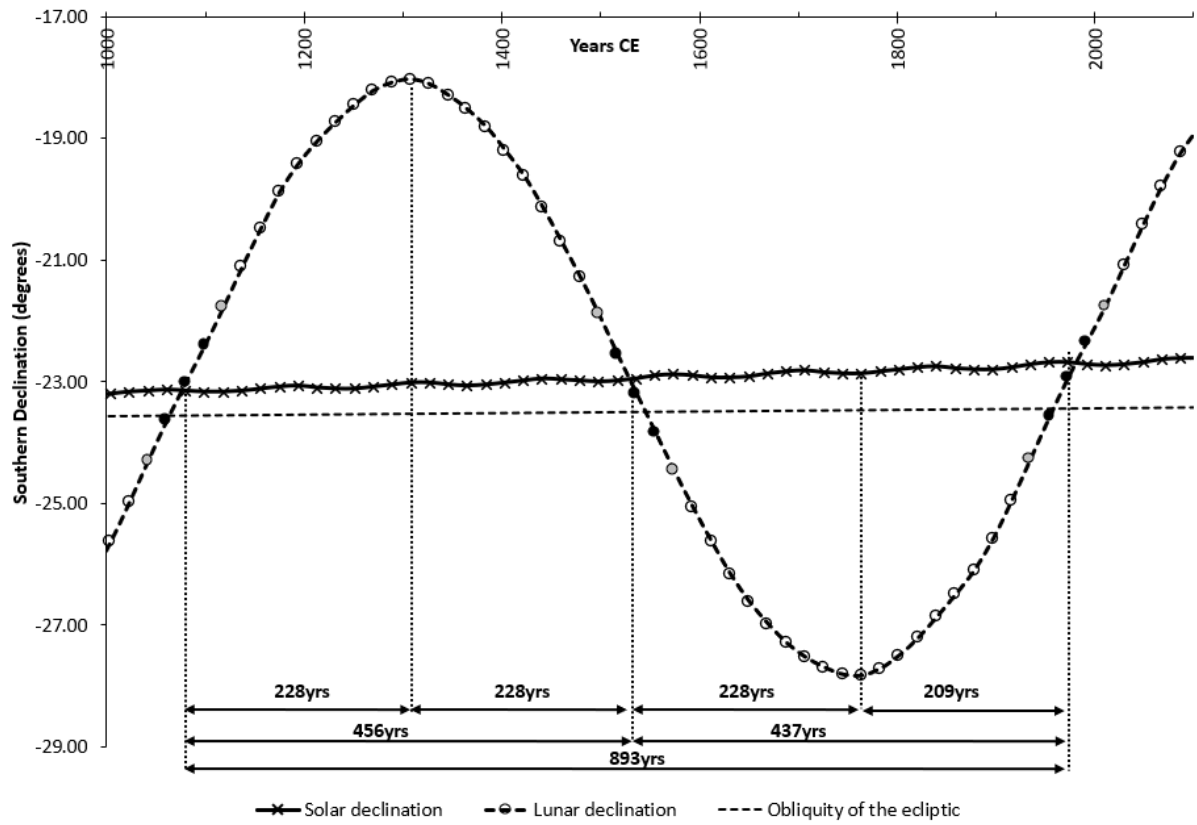

Figure S10: Lunar declinations since 1000 CE showing one periodicity of a Metonic lunation series of 893 yrs, composed of four phases (three 228-yr periods and one 209-yr period). Black-filled markers are total or annular solar eclipses; grey-filled markers are partial solar eclipses.

**TABLES:**

Table S1: Daily approximation of TSI values (W/m2) and daily rate of change (TSI Var) during 1992 (January to March inclusive). Calculations for TSU values are based on the Julian Day (JD) and associated sine value, where (i)  $y = \sin(2\pi \times ((JD-277)/366))$ , and (ii)  $TSI = 1361 + (y \times 46.9)$ .

| Date      | Sine JD value | TSI W/m2 | TSI Var W/m2 | Date  | Sine JD value | TSI W/m2 | TSI Var W/m2 | Date     | Sine JD value | TSI W/m2  | TSI Var W/m2 |         |         |       |
|-----------|---------------|----------|--------------|-------|---------------|----------|--------------|----------|---------------|-----------|--------------|---------|---------|-------|
| 1-Jan-92  | 0             | 0.9991   | 1407.86      |       |               |          |              | 1-Mar-92 | 60            | 0.5511    | 1386.85      | -0.67   |         |       |
| 2-Jan-92  | 1             | 0.9997   | 1407.88      | 0.03  | 2-Feb-92      | 32       | 0.8745       | 1402.01  | -0.38         | 2-Mar-92  | 61           | 0.5367  | 1386.17 | -0.67 |
| 3-Jan-92  | 2             | 1.0000   | 1407.90      | 0.01  | 3-Feb-92      | 33       | 0.8660       | 1401.62  | -0.40         | 3-Mar-92  | 62           | 0.5221  | 1385.49 | -0.68 |
| 4-Jan-92  | 3             | 1.0000   | 1407.90      | 0.00  | 4-Feb-92      | 34       | 0.8573       | 1401.21  | -0.41         | 4-Mar-92  | 63           | 0.5074  | 1384.80 | -0.69 |
| 5-Jan-92  | 4             | 0.9997   | 1407.88      | -0.01 | 5-Feb-92      | 35       | 0.8484       | 1400.79  | -0.42         | 5-Mar-92  | 64           | 0.4925  | 1384.10 | -0.70 |
| 6-Jan-92  | 5             | 0.9991   | 1407.86      | -0.03 | 6-Feb-92      | 36       | 0.8391       | 1400.36  | -0.43         | 6-Mar-92  | 65           | 0.4775  | 1383.40 | -0.70 |
| 7-Jan-92  | 6             | 0.9982   | 1407.82      | -0.04 | 7-Feb-92      | 37       | 0.8297       | 1399.91  | -0.44         | 7-Mar-92  | 66           | 0.4624  | 1382.69 | -0.71 |
| 8-Jan-92  | 7             | 0.9970   | 1407.76      | -0.06 | 8-Feb-92      | 38       | 0.8200       | 1399.46  | -0.46         | 8-Mar-92  | 67           | 0.4471  | 1381.97 | -0.72 |
| 9-Jan-92  | 8             | 0.9955   | 1407.69      | -0.07 | 9-Feb-92      | 39       | 0.8100       | 1398.99  | -0.47         | 9-Mar-92  | 68           | 0.4317  | 1381.25 | -0.72 |
| 10-Jan-92 | 9             | 0.9938   | 1407.61      | -0.08 | 10-Feb-92     | 40       | 0.7998       | 1398.51  | -0.48         | 10-Mar-92 | 69           | 0.4161  | 1380.52 | -0.73 |
| 11-Jan-92 | 10            | 0.9917   | 1407.51      | -0.10 | 11-Feb-92     | 41       | 0.7894       | 1398.02  | -0.49         | 11-Mar-92 | 70           | 0.4005  | 1379.78 | -0.73 |
| 12-Jan-92 | 11            | 0.9894   | 1407.40      | -0.11 | 12-Feb-92     | 42       | 0.7788       | 1397.52  | -0.50         | 12-Mar-92 | 71           | 0.3847  | 1379.04 | -0.74 |
| 13-Jan-92 | 12            | 0.9867   | 1407.28      | -0.12 | 13-Feb-92     | 43       | 0.7679       | 1397.01  | -0.51         | 13-Mar-92 | 72           | 0.3688  | 1378.29 | -0.74 |
| 14-Jan-92 | 13            | 0.9838   | 1407.14      | -0.14 | 14-Feb-92     | 44       | 0.7568       | 1396.49  | -0.52         | 14-Mar-92 | 73           | 0.3528  | 1377.54 | -0.75 |
| 15-Jan-92 | 14            | 0.9806   | 1406.99      | -0.15 | 15-Feb-92     | 45       | 0.7454       | 1395.96  | -0.53         | 15-Mar-92 | 74           | 0.3366  | 1376.79 | -0.76 |
| 16-Jan-92 | 15            | 0.9771   | 1406.82      | -0.16 | 16-Feb-92     | 46       | 0.7339       | 1395.42  | -0.54         | 16-Mar-92 | 75           | 0.3204  | 1376.03 | -0.76 |
| 17-Jan-92 | 16            | 0.9733   | 1406.65      | -0.18 | 17-Feb-92     | 47       | 0.7221       | 1394.87  | -0.55         | 17-Mar-92 | 76           | 0.3041  | 1375.26 | -0.76 |
| 18-Jan-92 | 17            | 0.9692   | 1406.45      | -0.19 | 18-Feb-92     | 48       | 0.7101       | 1394.31  | -0.56         | 18-Mar-92 | 77           | 0.2877  | 1374.49 | -0.77 |
| 19-Jan-92 | 18            | 0.9648   | 1406.25      | -0.21 | 19-Feb-92     | 49       | 0.6979       | 1393.73  | -0.57         | 19-Mar-92 | 78           | 0.2712  | 1373.72 | -0.77 |
| 20-Jan-92 | 19            | 0.9601   | 1406.03      | -0.22 | 20-Feb-92     | 50       | 0.6855       | 1393.15  | -0.58         | 20-Mar-92 | 79           | 0.2547  | 1372.94 | -0.78 |
| 21-Jan-92 | 20            | 0.9552   | 1405.80      | -0.23 | 21-Feb-92     | 51       | 0.6729       | 1392.56  | -0.59         | 21-Mar-92 | 80           | 0.2380  | 1372.16 | -0.78 |
| 22-Jan-92 | 21            | 0.9500   | 1405.55      | -0.24 | 22-Feb-92     | 52       | 0.6602       | 1391.96  | -0.60         | 22-Mar-92 | 81           | 0.2213  | 1371.38 | -0.78 |
| 23-Jan-92 | 22            | 0.9445   | 1405.30      | -0.26 | 23-Feb-92     | 53       | 0.6472       | 1391.35  | -0.61         | 23-Mar-92 | 82           | 0.2046  | 1370.59 | -0.79 |
| 24-Jan-92 | 23            | 0.9387   | 1405.03      | -0.27 | 24-Feb-92     | 54       | 0.6340       | 1390.73  | -0.62         | 24-Mar-92 | 83           | 0.1877  | 1369.80 | -0.79 |
| 25-Jan-92 | 24            | 0.9327   | 1404.74      | -0.28 | 25-Feb-92     | 55       | 0.6206       | 1390.11  | -0.63         | 25-Mar-92 | 84           | 0.1708  | 1369.01 | -0.79 |
| 26-Jan-92 | 25            | 0.9263   | 1404.44      | -0.30 | 26-Feb-92     | 56       | 0.6071       | 1389.47  | -0.64         | 26-Mar-92 | 85           | 0.1539  | 1368.22 | -0.80 |
| 27-Jan-92 | 26            | 0.9197   | 1404.13      | -0.31 | 27-Feb-92     | 57       | 0.5933       | 1388.83  | -0.64         | 27-Mar-92 | 86           | 0.1369  | 1367.42 | -0.80 |
| 28-Jan-92 | 27            | 0.9128   | 1403.81      | -0.32 | 28-Feb-92     | 58       | 0.5794       | 1388.17  | -0.65         | 28-Mar-92 | 87           | 0.1199  | 1366.62 | -0.80 |
| 29-Jan-92 | 28            | 0.9057   | 1403.48      | -0.34 | 29-Feb-92     | 59       | 0.5653       | 1387.51  | -0.66         | 29-Mar-92 | 88           | 0.1028  | 1365.82 | -0.80 |
| 30-Jan-92 | 29            | 0.8983   | 1403.13      | -0.35 |               |          |              |          | 30-Mar-92     | 89        | 0.0857       | 1365.02 | -0.80   |       |
| 31-Jan-92 | 30            | 0.8906   | 1402.77      | -0.36 |               |          |              |          | 31-Mar-92     | 90        | 0.0686       | 1364.22 | -0.80   |       |

Table S2: Daily approximation of TSI values (W/m<sup>2</sup>) and daily rate of change (TSI Var) during 1992 (April to June inclusive). Calculations for TSU values are based on the Julian Day (JD) and associated sine value, where (i)  $y = \sin(2\pi \times ((JD-277)/366))$ , and (ii)  $TSI = 1361 + (y \times 46.9)$ .

| Date      | JD  | Sine value | TSI W/m <sup>2</sup> | TSI Var W/m <sup>2</sup> | Date      | JD  | Sine value | TSI W/m <sup>2</sup> | TSI Var W/m <sup>2</sup> | Date      | JD  | Sine value | TSI W/m <sup>2</sup> | TSI Var W/m <sup>2</sup> |
|-----------|-----|------------|----------------------|--------------------------|-----------|-----|------------|----------------------|--------------------------|-----------|-----|------------|----------------------|--------------------------|
| 1-Apr-92  | 91  | 0.0515     | 1363.41              | -0.81                    | 1-May-92  | 121 | -0.4471    | 1340.03              | -0.72                    | 1-Jun-92  | 152 | -0.8391    | 1321.64              | -0.44                    |
| 2-Apr-92  | 92  | 0.0343     | 1362.61              | -0.81                    | 2-May-92  | 122 | -0.4624    | 1339.31              | -0.72                    | 2-Jun-92  | 153 | -0.8484    | 1321.21              | -0.43                    |
| 3-Apr-92  | 93  | 0.0172     | 1361.81              | -0.81                    | 3-May-92  | 123 | -0.4775    | 1338.60              | -0.71                    | 3-Jun-92  | 154 | -0.8573    | 1320.79              | -0.42                    |
| 4-Apr-92  | 94  | 0.0000     | 1361.00              | -0.81                    | 4-May-92  | 124 | -0.4925    | 1337.90              | -0.70                    | 4-Jun-92  | 155 | -0.8660    | 1320.38              | -0.41                    |
| 5-Apr-92  | 95  | -0.0172    | 1360.19              | -0.81                    | 5-May-92  | 125 | -0.5074    | 1337.20              | -0.70                    | 5-Jun-92  | 156 | -0.8745    | 1319.99              | -0.40                    |
| 6-Apr-92  | 96  | -0.0343    | 1359.39              | -0.81                    | 6-May-92  | 126 | -0.5221    | 1336.51              | -0.69                    | 6-Jun-92  | 157 | -0.8827    | 1319.60              | -0.38                    |
| 7-Apr-92  | 97  | -0.0515    | 1358.59              | -0.81                    | 7-May-92  | 127 | -0.5367    | 1335.83              | -0.68                    | 7-Jun-92  | 158 | -0.8906    | 1319.23              | -0.37                    |
| 8-Apr-92  | 98  | -0.0686    | 1357.78              | -0.81                    | 8-May-92  | 128 | -0.5511    | 1335.15              | -0.68                    | 8-Jun-92  | 159 | -0.8983    | 1318.87              | -0.36                    |
| 9-Apr-92  | 99  | -0.0857    | 1356.98              | -0.81                    | 9-May-92  | 129 | -0.5653    | 1334.49              | -0.67                    | 9-Jun-92  | 160 | -0.9057    | 1318.52              | -0.35                    |
| 10-Apr-92 | 100 | -0.1028    | 1356.18              | -0.80                    | 10-May-92 | 130 | -0.5794    | 1333.83              | -0.66                    | 10-Jun-92 | 161 | -0.9128    | 1318.19              | -0.34                    |
| 11-Apr-92 | 101 | -0.1199    | 1355.38              | -0.80                    | 11-May-92 | 131 | -0.5933    | 1333.17              | -0.65                    | 11-Jun-92 | 162 | -0.9197    | 1317.87              | -0.32                    |
| 12-Apr-92 | 102 | -0.1369    | 1354.58              | -0.80                    | 12-May-92 | 132 | -0.6071    | 1332.53              | -0.64                    | 12-Jun-92 | 163 | -0.9263    | 1317.56              | -0.31                    |
| 13-Apr-92 | 103 | -0.1539    | 1353.78              | -0.80                    | 13-May-92 | 133 | -0.6206    | 1331.89              | -0.64                    | 13-Jun-92 | 164 | -0.9327    | 1317.26              | -0.30                    |
| 14-Apr-92 | 104 | -0.1708    | 1352.99              | -0.80                    | 14-May-92 | 134 | -0.6340    | 1331.27              | -0.63                    | 14-Jun-92 | 165 | -0.9387    | 1316.97              | -0.28                    |
| 15-Apr-92 | 105 | -0.1877    | 1352.20              | -0.80                    | 15-May-92 | 135 | -0.6472    | 1330.65              | -0.62                    | 15-Jun-92 | 166 | -0.9445    | 1316.70              | -0.27                    |
| 16-Apr-92 | 106 | -0.2046    | 1351.41              | -0.79                    | 16-May-92 | 136 | -0.6602    | 1330.04              | -0.61                    | 16-Jun-92 | 167 | -0.9500    | 1316.45              | -0.26                    |
| 17-Apr-92 | 107 | -0.2213    | 1350.62              | -0.79                    | 17-May-92 | 137 | -0.6729    | 1329.44              | -0.60                    | 17-Jun-92 | 168 | -0.9552    | 1316.20              | -0.24                    |
| 18-Apr-92 | 108 | -0.2380    | 1349.84              | -0.79                    | 18-May-92 | 138 | -0.6855    | 1328.85              | -0.59                    | 18-Jun-92 | 169 | -0.9601    | 1315.97              | -0.23                    |
| 19-Apr-92 | 109 | -0.2547    | 1349.06              | -0.78                    | 19-May-92 | 139 | -0.6979    | 1328.27              | -0.58                    | 19-Jun-92 | 170 | -0.9648    | 1315.75              | -0.22                    |
| 20-Apr-92 | 110 | -0.2712    | 1348.28              | -0.78                    | 20-May-92 | 140 | -0.7101    | 1327.69              | -0.57                    | 20-Jun-92 | 171 | -0.9692    | 1315.55              | -0.21                    |
| 21-Apr-92 | 111 | -0.2877    | 1347.51              | -0.78                    | 21-May-92 | 141 | -0.7221    | 1327.13              | -0.56                    | 21-Jun-92 | 172 | -0.9733    | 1315.35              | -0.19                    |
| 22-Apr-92 | 112 | -0.3041    | 1346.74              | -0.77                    | 22-May-92 | 142 | -0.7339    | 1326.58              | -0.55                    | 22-Jun-92 | 173 | -0.9771    | 1315.18              | -0.18                    |
| 23-Apr-92 | 113 | -0.3204    | 1345.97              | -0.77                    | 23-May-92 | 143 | -0.7454    | 1326.04              | -0.54                    | 23-Jun-92 | 174 | -0.9806    | 1315.01              | -0.16                    |
| 24-Apr-92 | 114 | -0.3366    | 1345.21              | -0.76                    | 24-May-92 | 144 | -0.7568    | 1325.51              | -0.53                    | 24-Jun-92 | 175 | -0.9838    | 1314.86              | -0.15                    |
| 25-Apr-92 | 115 | -0.3528    | 1344.46              | -0.76                    | 25-May-92 | 145 | -0.7679    | 1324.99              | -0.52                    | 25-Jun-92 | 176 | -0.9867    | 1314.72              | -0.14                    |
| 26-Apr-92 | 116 | -0.3688    | 1343.71              | -0.76                    | 26-May-92 | 146 | -0.7788    | 1324.48              | -0.51                    | 26-Jun-92 | 177 | -0.9894    | 1314.60              | -0.12                    |
| 27-Apr-92 | 117 | -0.3847    | 1342.96              | -0.75                    | 27-May-92 | 147 | -0.7894    | 1323.98              | -0.50                    | 27-Jun-92 | 178 | -0.9917    | 1314.49              | -0.11                    |
| 28-Apr-92 | 118 | -0.4005    | 1342.22              | -0.74                    | 28-May-92 | 148 | -0.7998    | 1323.49              | -0.49                    | 28-Jun-92 | 179 | -0.9938    | 1314.39              | -0.10                    |
| 29-Apr-92 | 119 | -0.4161    | 1341.48              | -0.74                    | 29-May-92 | 149 | -0.8100    | 1323.01              | -0.48                    | 29-Jun-92 | 180 | -0.9955    | 1314.31              | -0.08                    |
| 30-Apr-92 | 120 | -0.4317    | 1340.75              | -0.73                    | 30-May-92 | 150 | -0.8200    | 1322.54              | -0.47                    | 30-Jun-92 | 181 | -0.9970    | 1314.24              | -0.07                    |
|           |     |            |                      |                          | 31-May-92 | 151 | -0.8297    | 1322.09              | -0.46                    |           |     |            |                      |                          |



Table S3: Daily approximation of TSI values (W/m<sup>2</sup>) and daily rate of change (TSI Var) during 1992 (July to September inclusive). Calculations for TSU values are based on the Julian Day (JD) and associated sine value, where (i)  $y = \sin(2\pi \times ((JD - 277)/366))$ , and (ii)  $TSI = 1361 + (y \times 46.9)$ .

| Date      | Sine JD value | TSI W/m <sup>2</sup> | TSI Var W/m <sup>2</sup> | Date  | Sine JD value | TSI W/m <sup>2</sup> | TSI Var W/m <sup>2</sup> | Date    | Sine JD value | TSI W/m <sup>2</sup> | TSI Var W/m <sup>2</sup> |         |         |      |
|-----------|---------------|----------------------|--------------------------|-------|---------------|----------------------|--------------------------|---------|---------------|----------------------|--------------------------|---------|---------|------|
| 1-Jul-92  | 182           | -0.9982              | 1314.20                  | -0.04 | 1-Aug-92      | 213                  | -0.8906                  | 1319.23 | 0.42          | 1-Sep-92             | 244                      | -0.5367 | 1335.83 | 0.68 |
| 2-Jul-92  | 183           | -0.9991              | 1314.15                  | -0.05 | 2-Aug-92      | 214                  | -0.8827                  | 1319.60 | 0.37          | 2-Sep-92             | 245                      | -0.5221 | 1336.51 | 0.68 |
| 3-Jul-92  | 184           | -0.9997              | 1314.12                  | -0.03 | 3-Aug-92      | 215                  | -0.8745                  | 1319.99 | 0.38          | 3-Sep-92             | 246                      | -0.5074 | 1337.20 | 0.69 |
| 4-Jul-92  | 185           | -1.0000              | 1314.10                  | -0.02 | 4-Aug-92      | 216                  | -0.8660                  | 1320.38 | 0.40          | 4-Sep-92             | 247                      | -0.4925 | 1337.90 | 0.70 |
| 5-Jul-92  | 186           | -1.0000              | 1314.10                  | 0.00  | 5-Aug-92      | 217                  | -0.8573                  | 1320.79 | 0.41          | 5-Sep-92             | 248                      | -0.4775 | 1338.60 | 0.70 |
| 6-Jul-92  | 187           | -0.9997              | 1314.11                  | 0.01  | 6-Aug-92      | 218                  | -0.8484                  | 1321.21 | 0.42          | 6-Sep-92             | 249                      | -0.4624 | 1339.31 | 0.71 |
| 7-Jul-92  | 188           | -0.9991              | 1314.14                  | 0.02  | 7-Aug-92      | 219                  | -0.8391                  | 1321.64 | 0.43          | 7-Sep-92             | 250                      | -0.4471 | 1340.03 | 0.72 |
| 8-Jul-92  | 189           | -0.9982              | 1314.17                  | 0.04  | 8-Aug-92      | 220                  | -0.8297                  | 1322.09 | 0.44          | 8-Sep-92             | 251                      | -0.4317 | 1340.75 | 0.72 |
| 9-Jul-92  | 190           | -0.9970              | 1314.23                  | 0.05  | 9-Aug-92      | 221                  | -0.8200                  | 1322.54 | 0.46          | 9-Sep-92             | 252                      | -0.4161 | 1341.48 | 0.73 |
| 10-Jul-92 | 191           | -0.9955              | 1314.29                  | 0.07  | 10-Aug-92     | 222                  | -0.8100                  | 1323.01 | 0.47          | 10-Sep-92            | 253                      | -0.4005 | 1342.22 | 0.73 |
| 11-Jul-92 | 192           | -0.9938              | 1314.37                  | 0.08  | 11-Aug-92     | 223                  | -0.7998                  | 1323.49 | 0.48          | 11-Sep-92            | 254                      | -0.3847 | 1342.96 | 0.74 |
| 12-Jul-92 | 193           | -0.9917              | 1314.46                  | 0.09  | 12-Aug-92     | 224                  | -0.7894                  | 1323.98 | 0.49          | 12-Sep-92            | 255                      | -0.3688 | 1343.71 | 0.75 |
| 13-Jul-92 | 194           | -0.9894              | 1314.57                  | 0.11  | 13-Aug-92     | 225                  | -0.7788                  | 1324.48 | 0.50          | 13-Sep-92            | 256                      | -0.3528 | 1344.46 | 0.75 |
| 14-Jul-92 | 195           | -0.9867              | 1314.69                  | 0.12  | 14-Aug-92     | 226                  | -0.7679                  | 1324.99 | 0.51          | 14-Sep-92            | 257                      | -0.3366 | 1345.21 | 0.76 |
| 15-Jul-92 | 196           | -0.9838              | 1314.83                  | 0.13  | 15-Aug-92     | 227                  | -0.7568                  | 1325.51 | 0.52          | 15-Sep-92            | 258                      | -0.3204 | 1345.97 | 0.76 |
| 16-Jul-92 | 197           | -0.9806              | 1314.98                  | 0.15  | 16-Aug-92     | 228                  | -0.7454                  | 1326.04 | 0.53          | 16-Sep-92            | 259                      | -0.3041 | 1346.74 | 0.76 |
| 17-Jul-92 | 198           | -0.9771              | 1315.14                  | 0.16  | 17-Aug-92     | 229                  | -0.7339                  | 1326.58 | 0.54          | 17-Sep-92            | 260                      | -0.2877 | 1347.51 | 0.77 |
| 18-Jul-92 | 199           | -0.9733              | 1315.31                  | 0.18  | 18-Aug-92     | 230                  | -0.7221                  | 1327.13 | 0.55          | 18-Sep-92            | 261                      | -0.2712 | 1348.28 | 0.77 |
| 19-Jul-92 | 200           | -0.9692              | 1315.50                  | 0.19  | 19-Aug-92     | 231                  | -0.7101                  | 1327.69 | 0.56          | 19-Sep-92            | 262                      | -0.2547 | 1349.06 | 0.78 |
| 20-Jul-92 | 201           | -0.9648              | 1315.71                  | 0.20  | 20-Aug-92     | 232                  | -0.6979                  | 1328.27 | 0.57          | 20-Sep-92            | 263                      | -0.2380 | 1349.84 | 0.78 |
| 21-Jul-92 | 202           | -0.9601              | 1315.92                  | 0.22  | 21-Aug-92     | 233                  | -0.6855                  | 1328.85 | 0.58          | 21-Sep-92            | 264                      | -0.2213 | 1350.62 | 0.78 |
| 22-Jul-92 | 203           | -0.9552              | 1316.15                  | 0.23  | 22-Aug-92     | 234                  | -0.6729                  | 1329.44 | 0.59          | 22-Sep-92            | 265                      | -0.2046 | 1351.41 | 0.79 |
| 23-Jul-92 | 204           | -0.9500              | 1316.40                  | 0.24  | 23-Aug-92     | 235                  | -0.6602                  | 1330.04 | 0.60          | 23-Sep-92            | 266                      | -0.1877 | 1352.20 | 0.79 |
| 24-Jul-92 | 205           | -0.9445              | 1316.65                  | 0.26  | 24-Aug-92     | 236                  | -0.6472                  | 1330.65 | 0.61          | 24-Sep-92            | 267                      | -0.1708 | 1352.99 | 0.79 |
| 25-Jul-92 | 206           | -0.9387              | 1316.92                  | 0.27  | 25-Aug-92     | 237                  | -0.6340                  | 1331.27 | 0.62          | 25-Sep-92            | 268                      | -0.1539 | 1353.78 | 0.79 |
| 26-Jul-92 | 207           | -0.9327              | 1317.20                  | 0.28  | 26-Aug-92     | 238                  | -0.6206                  | 1331.89 | 0.63          | 26-Sep-92            | 269                      | -0.1369 | 1354.58 | 0.80 |
| 27-Jul-92 | 208           | -0.9263              | 1317.50                  | 0.30  | 27-Aug-92     | 239                  | -0.6071                  | 1332.53 | 0.64          | 27-Sep-92            | 270                      | -0.1199 | 1355.38 | 0.80 |
| 28-Jul-92 | 209           | -0.9197              | 1317.81                  | 0.31  | 28-Aug-92     | 240                  | -0.5933                  | 1333.17 | 0.64          | 28-Sep-92            | 271                      | -0.1028 | 1356.18 | 0.80 |
| 29-Jul-92 | 210           | -0.9128              | 1318.13                  | 0.32  | 29-Aug-92     | 241                  | -0.5794                  | 1333.83 | 0.65          | 29-Sep-92            | 272                      | -0.0857 | 1356.98 | 0.80 |
| 30-Jul-92 | 211           | -0.9057              | 1318.46                  | 0.33  | 30-Aug-92     | 242                  | -0.5653                  | 1334.49 | 0.66          | 30-Sep-92            | 273                      | -0.0686 | 1357.78 | 0.80 |
| 31-Jul-92 | 212           | -0.8983              | 1318.81                  | 0.35  | 31-Aug-92     | 243                  | -0.5511                  | 1335.15 | 0.67          |                      |                          |         |         |      |

Kelsey, A. Supplemental Information.

Table S4: Daily approximation of TSI values (W/m<sup>2</sup>) and daily rate of change (TSI Var) during 1992 (October to December inclusive). Calculations for TSU values are based on the Julian Day (JD) and associated sine value, where (i)  $y = \sin(2\pi \times ((JD - 277)/366))$ , and (ii)  $TSI = 1361 + (y \times 46.9)$ .

| Date      | JD  | Sine value | TSI W/m <sup>2</sup> | TSI Var W/m <sup>2</sup> | Date      | JD  | Sine value | TSI W/m <sup>2</sup> | TSI Var W/m <sup>2</sup> | Date      | JD  | Sine value | TSI W/m <sup>2</sup> | TSI Var W/m <sup>2</sup> |
|-----------|-----|------------|----------------------|--------------------------|-----------|-----|------------|----------------------|--------------------------|-----------|-----|------------|----------------------|--------------------------|
| 1-Oct-92  | 274 | -0.0515    | 1358.59              | 0.80                     | 1-Nov-92  | 305 | 0.4624     | 1382.69              | 0.72                     | 1-Dec-92  | 335 | 0.8391     | 1400.36              | 0.44                     |
| 2-Oct-92  | 275 | -0.0343    | 1359.39              | 0.80                     | 2-Nov-92  | 306 | 0.4775     | 1383.40              | 0.71                     | 2-Dec-92  | 336 | 0.8484     | 1400.79              | 0.43                     |
| 3-Oct-92  | 276 | -0.0172    | 1360.19              | 0.80                     | 3-Nov-92  | 307 | 0.4925     | 1384.10              | 0.70                     | 3-Dec-92  | 337 | 0.8573     | 1401.21              | 0.42                     |
| 4-Oct-92  | 277 | 0.0000     | 1361.00              | 0.81                     | 4-Nov-92  | 308 | 0.5074     | 1384.80              | 0.70                     | 4-Dec-92  | 338 | 0.8660     | 1401.62              | 0.41                     |
| 5-Oct-92  | 278 | 0.0172     | 1361.81              | 0.81                     | 5-Nov-92  | 309 | 0.5221     | 1385.49              | 0.69                     | 5-Dec-92  | 339 | 0.8745     | 1402.01              | 0.40                     |
| 6-Oct-92  | 279 | 0.0343     | 1362.61              | 0.80                     | 6-Nov-92  | 310 | 0.5367     | 1386.17              | 0.68                     | 6-Dec-92  | 340 | 0.8827     | 1402.40              | 0.38                     |
| 7-Oct-92  | 280 | 0.0515     | 1363.41              | 0.80                     | 7-Nov-92  | 311 | 0.5511     | 1386.85              | 0.68                     | 7-Dec-92  | 341 | 0.8906     | 1402.77              | 0.37                     |
| 8-Oct-92  | 281 | 0.0686     | 1364.22              | 0.80                     | 8-Nov-92  | 312 | 0.5653     | 1387.51              | 0.67                     | 8-Dec-92  | 342 | 0.8983     | 1403.13              | 0.36                     |
| 9-Oct-92  | 282 | 0.0857     | 1365.02              | 0.80                     | 9-Nov-92  | 313 | 0.5794     | 1388.17              | 0.66                     | 9-Dec-92  | 343 | 0.9057     | 1403.48              | 0.35                     |
| 10-Oct-92 | 283 | 0.1028     | 1365.82              | 0.80                     | 10-Nov-92 | 314 | 0.5933     | 1388.83              | 0.65                     | 10-Dec-92 | 344 | 0.9128     | 1403.81              | 0.34                     |
| 11-Oct-92 | 284 | 0.1199     | 1366.62              | 0.80                     | 11-Nov-92 | 315 | 0.6071     | 1389.47              | 0.64                     | 11-Dec-92 | 345 | 0.9197     | 1404.13              | 0.32                     |
| 12-Oct-92 | 285 | 0.1369     | 1367.42              | 0.80                     | 12-Nov-92 | 316 | 0.6206     | 1390.11              | 0.64                     | 12-Dec-92 | 346 | 0.9263     | 1404.44              | 0.31                     |
| 13-Oct-92 | 286 | 0.1539     | 1368.22              | 0.80                     | 13-Nov-92 | 317 | 0.6340     | 1390.73              | 0.63                     | 13-Dec-92 | 347 | 0.9327     | 1404.74              | 0.30                     |
| 14-Oct-92 | 287 | 0.1708     | 1369.01              | 0.79                     | 14-Nov-92 | 318 | 0.6472     | 1391.35              | 0.62                     | 14-Dec-92 | 348 | 0.9387     | 1405.03              | 0.28                     |
| 15-Oct-92 | 288 | 0.1877     | 1369.80              | 0.79                     | 15-Nov-92 | 319 | 0.6602     | 1391.96              | 0.61                     | 15-Dec-92 | 349 | 0.9445     | 1405.30              | 0.27                     |
| 16-Oct-92 | 289 | 0.2046     | 1370.59              | 0.79                     | 16-Nov-92 | 320 | 0.6729     | 1392.56              | 0.60                     | 16-Dec-92 | 350 | 0.9500     | 1405.55              | 0.26                     |
| 17-Oct-92 | 290 | 0.2213     | 1371.38              | 0.79                     | 17-Nov-92 | 321 | 0.6855     | 1393.15              | 0.59                     | 17-Dec-92 | 351 | 0.9552     | 1405.80              | 0.24                     |
| 18-Oct-92 | 291 | 0.2380     | 1372.16              | 0.78                     | 18-Nov-92 | 322 | 0.6979     | 1393.73              | 0.58                     | 18-Dec-92 | 352 | 0.9601     | 1406.03              | 0.23                     |
| 19-Oct-92 | 292 | 0.2547     | 1372.94              | 0.78                     | 19-Nov-92 | 323 | 0.7101     | 1394.31              | 0.57                     | 19-Dec-92 | 353 | 0.9648     | 1406.25              | 0.22                     |
| 20-Oct-92 | 293 | 0.2712     | 1373.72              | 0.78                     | 20-Nov-92 | 324 | 0.7221     | 1394.87              | 0.56                     | 20-Dec-92 | 354 | 0.9692     | 1406.45              | 0.21                     |
| 21-Oct-92 | 294 | 0.2877     | 1374.49              | 0.77                     | 21-Nov-92 | 325 | 0.7339     | 1395.42              | 0.55                     | 21-Dec-92 | 355 | 0.9733     | 1406.65              | 0.19                     |
| 22-Oct-92 | 295 | 0.3041     | 1375.26              | 0.77                     | 22-Nov-92 | 326 | 0.7454     | 1395.96              | 0.54                     | 22-Dec-92 | 356 | 0.9771     | 1406.82              | 0.18                     |
| 23-Oct-92 | 296 | 0.3204     | 1376.03              | 0.76                     | 23-Nov-92 | 327 | 0.7568     | 1396.49              | 0.53                     | 23-Dec-92 | 357 | 0.9806     | 1406.99              | 0.16                     |
| 24-Oct-92 | 297 | 0.3366     | 1376.79              | 0.76                     | 24-Nov-92 | 328 | 0.7679     | 1397.01              | 0.52                     | 24-Dec-92 | 358 | 0.9838     | 1407.14              | 0.15                     |
| 25-Oct-92 | 298 | 0.3528     | 1377.54              | 0.76                     | 25-Nov-92 | 329 | 0.7788     | 1397.52              | 0.51                     | 25-Dec-92 | 359 | 0.9867     | 1407.28              | 0.14                     |
| 26-Oct-92 | 299 | 0.3688     | 1378.29              | 0.75                     | 26-Nov-92 | 330 | 0.7894     | 1398.02              | 0.50                     | 26-Dec-92 | 360 | 0.9894     | 1407.40              | 0.12                     |
| 27-Oct-92 | 300 | 0.3847     | 1379.04              | 0.75                     | 27-Nov-92 | 331 | 0.7998     | 1398.51              | 0.49                     | 27-Dec-92 | 361 | 0.9917     | 1407.51              | 0.11                     |
| 28-Oct-92 | 301 | 0.4005     | 1379.78              | 0.74                     | 28-Nov-92 | 332 | 0.8100     | 1398.99              | 0.48                     | 28-Dec-92 | 362 | 0.9938     | 1407.61              | 0.10                     |
| 29-Oct-92 | 302 | 0.4161     | 1380.52              | 0.73                     | 29-Nov-92 | 333 | 0.8200     | 1399.46              | 0.47                     | 29-Dec-92 | 363 | 0.9955     | 1407.69              | 0.08                     |
| 30-Oct-92 | 303 | 0.4317     | 1381.25              | 0.73                     | 30-Nov-92 | 334 | 0.8297     | 1399.91              | 0.46                     | 30-Dec-92 | 364 | 0.9970     | 1407.76              | 0.07                     |
| 31-Oct-92 | 304 | 0.4471     | 1381.97              | 0.72                     |           |     |            |                      |                          | 31-Dec-92 | 365 | 0.9982     | 1407.82              | 0.06                     |

Table S5: Table of cycles. Palaeoclimatic and modern climatic cycles and their associations

| Cycle                    | Length (Mean) | Range/Variants     | Multiples/Association                                  | Records                                                                                                                                                                                                                                                                                  |
|--------------------------|---------------|--------------------|--------------------------------------------------------|------------------------------------------------------------------------------------------------------------------------------------------------------------------------------------------------------------------------------------------------------------------------------------------|
| 3.8 yr                   |               |                    |                                                        | El Nino periodicity in NINO3.4; SST                                                                                                                                                                                                                                                      |
| 18.6 yr                  |               |                    |                                                        | Lunar nodal cycle; tidal sedimentation; air-pressure                                                                                                                                                                                                                                     |
| 19 yr                    |               |                    | Metonic lunation cycle<br>38 yrs; 57 yrs; 494 yrs      | Be <sub>10</sub> spectral peak in Holocene ice; air pressure; air temperature; precipitation data; PDO                                                                                                                                                                                   |
| 57 yr                    | 57 yrs        |                    | 114 yrs, 228 yrs                                       | Radiocarbon; PDO; North Atlantic Oscillation; global air temperature; length of day                                                                                                                                                                                                      |
| 104 yr                   | 104 yrs       |                    | 208 yrs, 416 yrs                                       | Radiocarbon                                                                                                                                                                                                                                                                              |
| 131 yr                   | 131 yrs       |                    |                                                        | Radiocarbon; ice-cores; tropical Atlantic cyclones; ocean sediments; Nile water levels; auroral records; fire and drought cycles in China, Spain and Indonesia; arctic atmospheric oscillation; solar insolation; periodic variation in the interhemispheric offset of radiocarbon ages; |
| Bruckner                 | 32.5 yrs      | 30-35 yrs          |                                                        | dendrochronology;                                                                                                                                                                                                                                                                        |
| Bond                     | 1470±532 yrs  |                    |                                                        | Radiocarbon                                                                                                                                                                                                                                                                              |
| Cartwright sedimentation | ~493 yrs      |                    |                                                        | Radiocarbon; tidal sediments                                                                                                                                                                                                                                                             |
| Dansgaard-Oeschger       | 1ky-12ky      |                    | Occurs at multiples of 1470 yrs                        | Ice-cores, deep-sea sedimentary cores                                                                                                                                                                                                                                                    |
| ENSO (millennial scale)  | ~1490 yrs     |                    |                                                        | Peat humification data; radiocarbon                                                                                                                                                                                                                                                      |
| Gleissberg               |               | 70 yrs -100 yrs    | 77 yr; 88 yr                                           | Radiocarbon; dendrochronology; ice-cores; harmonic of sunspot cycle                                                                                                                                                                                                                      |
| Hale                     | 22.8 yr       |                    | 57 yrs; sunspot cycle                                  | Sunspot data (TSI, radio flux, magnetic, flares/CMEs, galactic cosmic ray flux); dendrochronology; ice-cores; strength of cyclogenesis; land air; SST; sea-level pressure; atmospheric pressure; equatorial wind patterns; the intensity of zonal flow                                   |
| Hallstadt                | ~2.3ky        |                    |                                                        | Radiocarbon; Palaeomagnetic; reconstructed sunspot numbers; ice-cores                                                                                                                                                                                                                    |
| Heinrich events          | 11±1ky        |                    | Occurs at multiples of 1470 yrs                        | Ice-cores, deep-sea sedimentary cores                                                                                                                                                                                                                                                    |
| ~100ky                   |               |                    |                                                        | Mathematical; oxygen isotopes from deep-sea sediment cores; uranium series dating coral terraces; geomagnetic dating                                                                                                                                                                     |
| ~41ky                    |               |                    | Milankovitch (obliquity)                               | Mathematical; oxygen isotopes from deep-sea sediment cores; uranium series dating coral terraces; geomagnetic dating                                                                                                                                                                     |
| ~21ky                    | ~19ky, ~23ky  | ~11.5ky half cycle | Milankovitch (eccentricity)<br>Milankovitch precession | Mathematical; oxygen isotopes from deep-sea sediment cores; uranium series dating coral terraces; geomagnetic dating; radiocarbon                                                                                                                                                        |
| Schwabe                  | 11.4 yrs      |                    | Sunspot cycle                                          | Sunspot data (TSI, radio flux, magnetic, flares/CMEs, galactic cosmic ray flux); dendrochronology; strength of cyclogenesis; land air; SST; sea-level pressure; atmospheric pressure; equatorial wind patterns; the intensity of zonal flow                                              |
| Suess de Vries           | ~208 yrs      | 171-235 yrs        |                                                        | Radiocarbon; ice-cores; harmonic of sunspot cycle; dendrochronology; glacier variations; ice core chronologies; monsoon intensity changes                                                                                                                                                |

Refs: (Attolini et al., 1990, Biagioni et al., 2015, Bond and Lotti, 1995, Bond et al., 1997, Bond et al., 1999, Bond et al., 2001, Branch et al., 2005, Chambers et al., 2012, Cohen and Sweetser, 1975, Currie, 1993, Damon and Linick, 1986, Damon and Sonett, 1991, Darby et al., 2012, Eddy, 1976, Edvardsson et al., 2011, Hamilton, 1973, Henry, 1927, Keele, 1910, Mayewski et al., 1997, Mazarella, 2008, Munk et al., 2002, Mörner, 2013, O'Brien and Currie, 1993, Oost et al., 1993, Raspopov et al., 2011, Siscoe, 1980, Sonett and Suess, 1984, Stuiver, 1961, Stuiver and Quay, 1980, Stuiver and Braziunas, 1989, Stuiver et al., 1995, Stuiver and Braziunas, 1998, Vázquez et al., 2015, Vines, 2008, Xue et al., 2008, Yiou et al., 1997, Yousef, 2000).

## References:

- ATTOLINI, M., CECCHINI, S., GALLI, M. & NANNI, T. 1990. On the persistence of the 22 yr solar cycle. *A Journal for Solar and Solar-Stellar Research and the Study of Solar Terrestrial Physics*, 125, 389-398.
- BARD, E., RAISBECK, G. M., YIOU, F. & JOUZEL, J. 2007. Comment on "Solar activity during the last 1000 yr inferred from radionuclide records" by Muscheler et al. (2007). *Quaternary Sci. Rev.*, 26, 2301-2304.
- BIAGIONI, S., KRASHEVSKA, V., ACHNOPHA, Y., SAAD, A., SABIHAM, S. & BEHLING, H. 2015. 8000 years of vegetation dynamics and environmental changes of a unique inland peat ecosystem of the Jambi Province in Central Sumatra, Indonesia. *Paleogeogr. Palaeocl.*, 440, 813-829.
- BOND, G., KROMER, B., BEER, J., MUSCHELER, R., EVANS, M. N., SHOWERS, W., HOFFMANN, S., LOTTI-BOND, R., HAJDAS, I. & BONANI, G. 2001. Persistent solar influence on North Atlantic climated during the Holocene. *Science*, 294, 2130-2136.
- BOND, G., SHOWERS, W., CHESEBY, M., LOTTI, R., ALMASI, P., DEMENOCAL, P., PRIORE, P., CULLEN, H., HAJDAS, I. & BONANI, G. 1997. A pervasive millennial-scale cycle in North Atlantic Holocene and Glacial climates. *Science*, 278, 1257-1266.
- BOND, G. C. & LOTTI, R. 1995. Iceberg discharges into the North Atlantic on millennial time scales during the last glaciation. *Science*, 267, 1005-1010.
- BOND, G. C., SHOWERS, W., ELLIOT, M., EVANS, M., LOTTI, R., HAJDAS, I., BONANI, G. & JOHNSON, S. 1999. The North Atlantic's 1-2 Kyr Climate Rhythm: Relation to Heinrich Events, Dansgaard/Oeschger Cycles and the Little Ice Age. *Mechanisms of Global Climate Change at Millennial Time Scales*. American Geophysical Union.
- BRANCH, N., CANTI, M., CLARK, P. & TURNEY, C. 2005. *Environmental Archaeology: Theoretical and Practical Approaches*, London; New York, London: Hodder Arnold; New York: Distributed in the United States by Oxford University Press.
- CHAMBERS, D. P., MERRIFIELD, M. A. & NEREM, R. S. 2012. Is there a 60-year oscillation in global mean sea level? *Geophys. Res. Lett.*, 39, 1-6.
- COHEN, T. J. & SWEETSER, E. I. 1975. The 'spectra' of the solar cycle and of data for Atlantic tropical cyclones. *Nature*, 256, 295-296.
- CURRIE, R. G. 1993. Luni-solar 18.6- and solar cycle 10–11-year signals in USA air temperature records. *Int. J. Climatol.*, 13, 31-50.
- DAMON, P. & LINICK, T. W. 1986. Geomagnetic-heliomagnetic modulation of atmospheric radiocarbon production. *Radiocarbon*, 28, 266-278.
- DAMON, P. & SONETT, C. 1991. Solar and atmospheric components of the atmospheric <sup>14</sup>C variation spectrum. In: SONETT, C., GIAMPAPA, M. & MATTHEWS, M. (eds.) *The Sun in Time*. Tucson: University of Arizona.
- DARBY, D. A., ORTIZ, J. D., GROSCH, C. E. & LUND, S. P. 2012. 1,500-year cycle in the Arctic Oscillation identified in Holocene Arctic sea-ice drift. *Nat. Geosci.*, 5, 897-900.
- EDDY, J. A. 1976. The Maunder Minimum. *Science*, 192, 1189-1202.
- EDVARDSSON, J., LINDERHOLM, H. W. & HAMMARLUND, D. 2011. Enigmatic cycles detected in subfossil and modern bog-pine chronologies from southern Sweden. *TRACE*, 9, 173-180.
- HAMILTON, W. L. 1973. Tidal cycles of volcanic eruptions: fortnightly to 19 yearly periods. *J. Geophys. Res.*, 78, 3363-3375.
- HENRY, A. J. 1927. The Bruckner cycle of climatic oscillations in the United States. *Annals of the Association of American Geographers*, 17, 60-71.
- KEELE, T. W. 1910. The great weather cycle. *Journal and Proceedings of the Royal Society of NSW*, 44, 25-76.

- MAYEWSKI, P. A., MEEKER, L. D., TWICKLER, M. S., WHITLOW, S., YANG, Q., LYONS, W. B. & PRENTICE, M. 1997. Major features and forcing of high-latitude northern hemisphere atmospheric circulation using a 110,000-year-long glaciochemical series. *J. Geophys. Res-Oceans*, 102, 26345-26366.
- MAZARELLA, A. 2008. Solar forcing of changes in atmospheric circulation, Earth's rotation and climate. *The Open Atmospheric Science Journal*, 2, 181-184.  
<https://doi.org/10.2174/1874282300802010181>
- MÖRNER, N.-A. 2013. Solar wind, Earth's rotation and changes in terrestrial climate. *Physical Review & Research International*, 3, 117-136.
- MUNK, W., DZIECIUCH, M. & JAYNE, S. 2002. Millennial climate variability: is there a tidal connection? *J. Climate*, 15, 370-385.
- O'BRIEN, D. P. & CURRIE, R. G. 1993. Observations of the 18.6-year cycle of air pressure and a theoretical model to explain certain aspects of this signal. *Clim. Dynam.*, 8.
- OOST, A. P., DE HAAS, H., IJNSEN, F., VAN DEN BOOGERT, J. M. & DE BOER, P. L. 1993. The 18.6 yr nodal cycle and its impact on tidal sedimentation. *Sediment. Geol.*, 87, 1-11.
- RASPOPOV, O. M., DERGACHEV, V. A., OGURTSOV, M. G., KOLSTRÖM, T., JUNGNER, H. & DMITRIEV, P. B. 2011. Variations in climate parameters at time intervals from hundreds to tens of millions of years in the past and its relation to solar activity. *J. Atmos. Sol-Terr. Phy.*, 73, 388-399.
- SISCOE, G. L. 1980. Evidence in the auroral record for secular solar variability. *Rev. Geophys.*, 18, 647-658.
- SONETT, C. P. & SUESS, H. E. 1984. Correlation of bristlecone pine ring widths with atmospheric  $^{14}\text{C}$  variations: a climate-Sun relation. *Nature*, 307, 141-143.
- STUIVER, M. 1961. Variations in radiocarbon concentration and sunspot activity. *J. Geophys. Res.*, 66, 273.
- STUIVER, M. & BRAZIUNAS, T. F. 1989. Atmospheric  $^{14}\text{C}$  and century-scale solar oscillations. *Nature*, 338, 405-408.
- STUIVER, M. & BRAZIUNAS, T. F. 1998. Anthropogenic and solar components of hemispheric  $^{14}\text{C}$ . *Geophys. Res. Lett.*, 25, 329-332.
- STUIVER, M., GROOTES, P. M. & BRAZIUNAS, T. F. 1995. The GISP2  $\delta^{18}\text{O}$  climate record of the past 16,500 years and the role of the Sun, ocean, and volcanoes. *Quaternary Res.*, 44, 341-354.
- STUIVER, M. & QUAY, P. D. 1980. Changes in atmospheric carbon-14 attributed to a variable sun. *Science*, 207, 11-19.
- VÁZQUEZ, A., CLIMENT, J. M., CASAIS, L. & QUINTANA, J. R. 2015. Current and future estimates for the fire frequency and the fire rotation period in the main woodland types of peninsular Spain: a case-study approach. *Forest Syst.*, 24, e031-e031.
- VINES, R. G. 2008. Australian rainfall patterns and the southern oscillation. 2. A regional perspective in relation to Luni-solar (Mn) and Solar-cycle (Sc) signals. *Rangeland J.* 30, 349.
- XUE, J., ZHONG, W., ZHAO, Y. & PENG, X. 2008. Holocene abrupt climate shifts and mid-Holocene drought intervals recorded in Barkol Lake of Northern Xinjiang of China. *Chinese Geogr. Sci.*, 18, 54-61.
- YIOU, R., FUHRER, K., MEEKER, L. D., JOUZEL, J., JOHNSEN, S. & MAYEWSKI, P. A. 1997. Paleoclimatic variability inferred from the spectral analysis of Greenland and Antarctic ice-core data. *J. Geophys. Res-Oceans*, 102, 26441-26454.
- YOUSEF, S. M. 2000. The solar Wolf-Gleissberg cycle and its influence on the Earth. *International Conference for Environmental Hazard*. Cairo: Cairo University.
